# Supplementary material
Source: publisher figshare collection journal article supplement (https://springernature.figshare.com/ndownloader/files/17627495)
Supplement: Supplementary file [file 17627495]

## Additional file 3

### Supplemental analyses

#### Analyses stratified on age

##### AGE HIGH (Age at baseline $\geq 45.7$ years)

Health care utilization during an 18-month follow-up period among outpatients with epilepsy

| Primary outcomes                     | Open access (ITT)<br>N = 169 | Control<br>N = 124 | ITT<br>Mean difference<br>(95%CI) |
|--------------------------------------|------------------------------|--------------------|-----------------------------------|
| Outpatient visits <sup>a</sup>       |                              |                    |                                   |
| Mean (SD)                            | 0.41 (0.97)                  | 0.38 (0.88)        | 0.04 (−0.18 to 0.25)              |
| Median (Range)                       | 0 (0–7)                      | 0 (0–6)            |                                   |
| Telephone consultations <sup>a</sup> |                              |                    |                                   |
| Mean (SD)                            | 0.86 (1.62)                  | 0.85 (1.39)        | 0.01 (−0.33 to 0.35)              |
| Median (Range)                       | 0 (0–10)                     | 1 (0–10)           |                                   |
| Hospitalizations <sup>a</sup>        |                              |                    |                                   |
| Mean (SD)                            | 0.08 (0.36)                  | 0.06 (0.26)        | 0.02 (−0.05 to 0.09)              |
| Median (Range)                       | 0 (0–3)                      | 0 (0–2)            |                                   |
| Emergency room visits <sup>b</sup>   |                              |                    |                                   |
| Mean (SD)                            | 0.08 (0.41)                  | 0.10 (0.42)        | −0.02 (−0.12 to 0.08)             |
| Median (Range)                       | 0 (0–4)                      | 0 (0–3)            |                                   |

<sup>a</sup> at the Department of Neurology, Aarhus University Hospital, <sup>b</sup> at Aarhus University Hospital

SD: Standard deviation; CI: Confidence interval; ITT: Intention-to-treat

The estimated IIT mean differences and 95% CIs were obtained after simple linear regression by using the bootstrap method with 1000 replications.

##### AGE LOW (Age at baseline $< 45.7$ years)

Health care utilization during an 18-month follow-up period among outpatients with epilepsy

| Primary outcomes                     | Open access (ITT)<br>N = 174 | Control<br>N = 119 | ITT<br>Mean difference<br>(95%CI) |
|--------------------------------------|------------------------------|--------------------|-----------------------------------|
| Outpatient visits <sup>a</sup>       |                              |                    |                                   |
| Mean (SD)                            | 0.48 (0.93)                  | 0.45 (0.84)        | 0.03 (−0.18 to 0.24)              |
| Median (Range)                       | 0 (0–6)                      | 0 (0–5)            |                                   |
| Telephone consultations <sup>a</sup> |                              |                    |                                   |
| Mean (SD)                            | 1.11 (2.09)                  | 1.78 (3.16)        | −0.67 (−1.29 to −0.04)            |
| Median (Range)                       | 0 (0–12)                     | 1 (0–22)           |                                   |
| Hospitalizations <sup>a</sup>        |                              |                    |                                   |
| Mean (SD)                            | 0.02 (0.18)                  | 0.12 (0.65)        | −0.09 (−0.22 to 0.03)             |
| Median (Range)                       | 0 (0–2)                      | 0 (0–5)            |                                   |
| Emergency room visits <sup>b</sup>   |                              |                    |                                   |
| Mean (SD)                            | 0.06 (0.34)                  | 0.27 (0.94)        | −0.21 (−0.38 to −0.03)            |
| Median (Range)                       | 0 (0–3)                      | 0 (0–7)            |                                   |

<sup>a</sup> at the Department of Neurology, Aarhus University Hospital, <sup>b</sup> at Aarhus University Hospital

SD: Standard deviation; CI: Confidence interval; ITT: Intention-to-treat

The estimated IIT mean differences and 95% CIs were obtained after simple linear regression by using the bootstrap method with 1000 replications.

## Additional file 3

### Analyses stratified on age

#### AGE HIGH (Age at baseline $\geq 45.7$ years)

Patient-reported outcomes measured 18 months after randomization among outpatients with epilepsy

| Secondary outcomes                           | N   | Open access (ITT) | N  | Control      | ITT: Difference <sup>a</sup> at 18-mo. follow-up (95%CI) |
|----------------------------------------------|-----|-------------------|----|--------------|----------------------------------------------------------|
| Well-being (WHO-5)<br>Mean (SD)              | 107 | 69.83(19.46)      | 89 | 69.48(17.69) | -1.36 (-5.59 to 2.87)                                    |
| Self-efficacy (GSE)<br>Mean (SD)             | 105 | 30.00(5.52)       | 90 | 29.56(5.95)  | -0.03 (-1.33 to 1.27)                                    |
| HLQ 4<br>Mean (SD)                           | 106 | 3.24(0.61)        | 90 | 3.35(0.53)   | -0.04 (-0.17 to 0.09)                                    |
| HLQ 6<br>Mean (SD)                           | 105 | 3.89(0.79)        | 91 | 3.85(0.90)   | -0.07 (-0.27 to 0.14)                                    |
| HLQ 9<br>Mean (SD)                           | 105 | 4.01(0.79)        | 90 | 3.90(0.88)   | -0.007 (-0.19 to 0.17)                                   |
| General health<br>Mean (SD)                  | 109 | 2.68(0.88)        | 92 | 2.66(0.73)   | 0.04 (-0.14 to 0.23)                                     |
| No. of seizure last year<br>Mean (SD)        | 93  | 2.71(13.00)       | 76 | 3.58(11.00)  | -0.69 (-4.02 to 2.67)                                    |
| Treatment side effects<br>Mean (SD)          | 108 | 1.53(0.77)        | 92 | 1.55(0.89)   | -0.05(-0.26 to 0.15)                                     |
| Patient activation <sup>b</sup><br>Mean (SD) | 108 | 3.39(0.61)        | 91 | 3.27(0.79)   | 0.08 (-0.09 to 0.25)                                     |
| Patient activation <sup>c</sup><br>Mean (SD) | 108 | 3.23(0.68)        | 91 | 3.10(0.80)   | 0.03(-0.15 to 0.22)                                      |
| Confidence<br>Mean (SD)                      | 97  | 1.38(0.64)        | 87 | 1.30(0.51)   | 0.01(-0.14 to 0.17)                                      |
| Safety<br>Mean (SD)                          | 88  | 1.43(0.67)        | 82 | 1.28(0.48)   | 0.10(-0.07 to 0.27)                                      |
| Satisfaction<br>Mean (SD)                    | 91  | 1.65(0.69)        | 79 | 1.59(0.59)   | 0.05 (-0.14 to 0.24)                                     |

<sup>a</sup> The estimated intention-to-treat differences and 95% CIs were obtained after multiple linear regression adjusted for baseline measure

<sup>b</sup> I am confident that I can tell when I need to get outpatient care

<sup>c</sup> I am confident I can figure out solutions when new situations or problems arise with my health condition

SD: Standard deviation; CI: Confidence interval; ITT: Intention-to-treat; WHO-5: WHO-5 Well-being Index; GSE: General Self-efficacy Scale; HLQ: Health Literacy Questionnaire

## Additional file 3

### Analyses stratified on age

#### AGE LOW (Age at baseline < 45.7 years)

Patient-reported outcomes measured 18 months after randomization among outpatients with epilepsy

| Secondary outcomes                           | N  | Open access (ITT) | N  | Control      | ITT: Difference <sup>a</sup> at 18-mo. follow-up (95%CI) |
|----------------------------------------------|----|-------------------|----|--------------|----------------------------------------------------------|
| Well-being (WHO-5)<br>Mean (SD)              | 91 | 63.65(19.01)      | 57 | 68.98(18.66) | -5.95 (-10.81 to -1.08)                                  |
| Self-efficacy (GSE)<br>Mean (SD)             | 90 | 29.52(5.90)       | 56 | 30.02(6.47)  | -0.50 (-2.11 to 1.12)                                    |
| HLQ 4<br>Mean (SD)                           | 88 | 3.25(0.61)        | 53 | 3.42(0.54)   | -0.14 (-0.29 to 0.006)                                   |
| HLQ 6<br>Mean (SD)                           | 88 | 3.80(0.82)        | 55 | 3.90(0.87)   | -0.02 (-0.26 to 0.21)                                    |
| HLQ 9<br>Mean (SD)                           | 88 | 4.04(0.76)        | 55 | 4.07(0.82)   | 0.005 (-0.22 to 0.23)                                    |
| General health<br>Mean (SD)                  | 92 | 2.57(0.99)        | 57 | 2.51(0.95)   | 0.05 (-0.19 to 0.30)                                     |
| No. of seizure last year<br>Mean (SD)        | 73 | 2.23(10.39)       | 46 | 2.52(8.83)   | -0.58 (-4.27 to 3.12)                                    |
| Treatment side effects<br>Mean (SD)          | 88 | 1.55(0.76)        | 57 | 1.56(0.71)   | -0.002(-0.20 to 0.19)                                    |
| Patient activation <sup>b</sup><br>Mean (SD) | 88 | 3.45(0.69)        | 55 | 3.45(0.74)   | -0.06 (-0.29 to 0.17)                                    |
| Patient activation <sup>c</sup><br>Mean (SD) | 89 | 3.20(0.77)        | 55 | 3.16 (0.66)  | -0.03(-0.27 to 0.20)                                     |
| Confidence<br>Mean (SD)                      | 84 | 1.40(0.66)        | 54 | 1.37(0.56)   | 0.05(-0.15 to 0.25)                                      |
| Safety<br>Mean (SD)                          | 77 | 1.39(0.73)        | 54 | 1.46(0.66)   | -0.09(-0.33 to 0.15)                                     |
| Satisfaction<br>Mean (SD)                    | 76 | 1.61(0.67)        | 53 | 1.62(0.60)   | -0.03 (-0.24 to 0.18)                                    |

<sup>a</sup> The estimated intention-to-treat differences and 95% CIs were obtained after multiple linear regression adjusted for baseline measure

<sup>b</sup> I am confident that I can tell when I need to get outpatient care

<sup>c</sup> I am confident I can figure out solutions when new situations or problems arise with my health condition

SD: Standard deviation; CI: Confidence interval; ITT: Intention-to-treat; WHO-5: WHO-5 Well-being Index; GSE: General Self-efficacy Scale; HLQ: Health Literacy Questionnaire

## Additional file 3

### Analyses stratified on gender

#### FEMALE

Health care utilization during an 18-month follow-up period among outpatients with epilepsy

| Primary outcomes                     | Open access (ITT)<br>N = 162 | Control<br>N = 130 | ITT<br>Mean difference<br>(95%CI) |
|--------------------------------------|------------------------------|--------------------|-----------------------------------|
| Outpatient visits <sup>a</sup>       |                              |                    |                                   |
| Mean (SD)                            | 0.55 (1.01)                  | 0.52 (1.04)        | 0.03 (−0.20 to 0.26)              |
| Median (Range)                       | 0 (0–7)                      | 0 (0–6)            |                                   |
| Telephone consultations <sup>a</sup> |                              |                    |                                   |
| Mean (SD)                            | 1.27 (2.17)                  | 1.62 (2.93)        | −0.36 (−0.95 to 0.24)             |
| Median (Range)                       | 0 (0–12)                     | 1 (0–22)           |                                   |
| Hospitalizations <sup>a</sup>        |                              |                    |                                   |
| Mean (SD)                            | 0.02 (0.19)                  | 0.11 (0.56)        | −0.08 (−0.18 to 0.01)             |
| Median (Range)                       | 0 (0–2)                      | 0 (0–5)            |                                   |
| Emergency room visits <sup>b</sup>   |                              |                    |                                   |
| Mean (SD)                            | 0.04 (0.22)                  | 0.19 (0.75)        | −0.16 (−0.29 to −0.02)            |
| Median (Range)                       | 0 (0–2)                      | 0 (0–7)            |                                   |

<sup>a</sup> at the Department of Neurology, Aarhus University Hospital, <sup>b</sup> at Aarhus University Hospital

SD: Standard deviation; CI: Confidence interval; ITT: Intention-to-treat

The estimated IIT mean differences and 95% CIs were obtained after simple linear regression by using the bootstrap method with 1000 replications.

#### MALE

Health care utilization during an 18-month follow-up period among outpatients with epilepsy

| Primary outcomes                     | Open access (ITT)<br>N = 181 | Control<br>N = 113 | ITT<br>Mean difference<br>(95%CI) |
|--------------------------------------|------------------------------|--------------------|-----------------------------------|
| Outpatient visits <sup>a</sup>       |                              |                    |                                   |
| Mean (SD)                            | 0.36 (0.88)                  | 0.29 (0.58)        | 0.07 (−0.10 to 0.23)              |
| Median (Range)                       | 0 (0–6)                      | 0 (0–2)            |                                   |
| Telephone consultations <sup>a</sup> |                              |                    |                                   |
| Mean (SD)                            | 0.74 (1.54)                  | 0.94 (1.71)        | −0.20 (−0.59 to 0.19)             |
| Median (Range)                       | 0 (0–10)                     | 1 (0–10)           |                                   |
| Hospitalizations <sup>a</sup>        |                              |                    |                                   |
| Mean (SD)                            | 0.07 (0.35)                  | 0.06 (0.41)        | 0.01 (−0.08 to 0.10)              |
| Median (Range)                       | 0 (0–3)                      | 0 (0–4)            |                                   |
| Emergency room visits <sup>b</sup>   |                              |                    |                                   |
| Mean (SD)                            | 0.10 (0.48)                  | 0.18 (0.70)        | −0.07 (−0.22 to 0.07)             |
| Median (Range)                       | 0 (0–4)                      | 0 (0–6)            |                                   |

<sup>a</sup> at the Department of Neurology, Aarhus University Hospital, <sup>b</sup> at Aarhus University Hospital

SD: Standard deviation; CI: Confidence interval; ITT: Intention-to-treat

The estimated IIT mean differences and 95% CIs were obtained after simple linear regression by using the bootstrap method with 1000 replications.

## Additional file 3

### Analyses stratified on gender

#### FEMALE

Patient-reported outcomes measured 18 months after randomization among outpatients with epilepsy

| Secondary outcomes                           | N  | Open access (ITT) | N  | Control      | ITT: Difference <sup>a</sup> at 18-mo. follow-up (95%CI) |
|----------------------------------------------|----|-------------------|----|--------------|----------------------------------------------------------|
| Well-being (WHO-5)<br>Mean (SD)              | 91 | 66.24(18.96)      | 79 | 67.24(18.91) | -2.94 (-7.32 to 1.44)                                    |
| Self-efficacy (GSE)<br>Mean (SD)             | 87 | 29.29(5.86)       | 80 | 29.21(6.19)  | -0.46 (-1.81 to 0.89)                                    |
| HLQ 4<br>Mean (SD)                           | 89 | 3.31(0.58)        | 78 | 3.35(0.59)   | -0.009 (-0.14 to 0.12)                                   |
| HLQ 6<br>Mean (SD)                           | 87 | 3.89(0.77)        | 79 | 3.93(0.79)   | -0.11 (-0.29 to 0.07)                                    |
| HLQ 9<br>Mean (SD)                           | 87 | 4.06(0.81)        | 79 | 4.03(0.76)   | -0.005 (-0.18 to 0.17)                                   |
| General health<br>Mean (SD)                  | 93 | 2.59(0.89)        | 80 | 2.70(0.83)   | -0.05 (-0.26 to 0.16)                                    |
| No. of seizure last year<br>Mean (SD)        | 78 | 2.32(9.60)        | 65 | 3.60(10.80)  | -1.51 (-4.97 to 1.95)                                    |
| Treatment side effects<br>Mean (SD)          | 90 | 1.51(0.71)        | 80 | 1.59(0.85)   | -0.14 (-0.32 to 0.05)                                    |
| Patient activation <sup>b</sup><br>Mean (SD) | 90 | 3.46(0.66)        | 79 | 3.39(0.72)   | 0.08 (-0.12 to 0.27)                                     |
| Patient activation <sup>c</sup><br>Mean (SD) | 91 | 3.26(0.73)        | 79 | 3.08(0.73)   | 0.12 (-0.08 to 0.32)                                     |
| Confidence<br>Mean (SD)                      | 86 | 1.34(0.59)        | 76 | 1.29(0.51)   | -0.02(-0.18 to 0.13)                                     |
| Safety<br>Mean (SD)                          | 80 | 1.34(0.57)        | 74 | 1.36(0.56)   | -0.08(-0.25 to 0.10)                                     |
| Satisfaction<br>Mean (SD)                    | 82 | 1.65(0.64)        | 69 | 1.58(0.55)   | 0.04 (-0.15 to 0.24)                                     |

<sup>a</sup> The estimated intention-to-treat differences and 95% CIs were obtained after multiple linear regression adjusted for baseline measure

<sup>b</sup> I am confident that I can tell when I need to get outpatient care

<sup>c</sup> I am confident I can figure out solutions when new situations or problems arise with my health condition

SD: Standard deviation; CI: Confidence interval; ITT: Intention-to-treat; WHO-5: WHO-5 Well-being Index; GSE: General Self-efficacy Scale; HLQ: Health Literacy Questionnaire

## Additional file 3

### Analyses stratified on gender

#### MALE

Patient-reported outcomes measured 18 months after randomization among outpatients with epilepsy

| Secondary outcomes                           | N   | Open access (ITT) | N  | Control      | ITT: Difference <sup>a</sup> at 18-mo. follow-up (95%CI) |
|----------------------------------------------|-----|-------------------|----|--------------|----------------------------------------------------------|
| Well-being (WHO-5)<br>Mean (SD)              | 107 | 67.63(19.93)      | 67 | 71.70(16.70) | -3.74 (-8.42 to 0.93)                                    |
| Self-efficacy (GSE)<br>Mean (SD)             | 90  | 30.18(5.55)       | 66 | 30.36(6.06)  | -0.09 (-1.59 to 1.42)                                    |
| HLQ 4<br>Mean (SD)                           | 105 | 3.19(0.62)        | 65 | 3.41(0.50)   | -0.15 (-0.29 to -0.002)                                  |
| HLQ 6<br>Mean (SD)                           | 106 | 3.82(0.83)        | 67 | 3.79(0.99)   | 0.05 (-0.19 to 0.30)                                     |
| HLQ 9<br>Mean (SD)                           | 106 | 3.99(0.75)        | 66 | 3.89(0.96)   | 0.04 (-0.18 to 0.27)                                     |
| General health<br>Mean (SD)                  | 108 | 2.66(0.97)        | 69 | 2.49(0.80)   | 0.12 (-0.09 to 0.34)                                     |
| No. of seizure last year<br>Mean (SD)        | 88  | 2.66(13.66)       | 57 | 2.70(9.57)   | 0.24 (-2.27 to 2.75)                                     |
| Treatment side effects<br>Mean (SD)          | 106 | 1.56(0.81)        | 69 | 1.52(0.80)   | 0.05 (-0.17 to 0.28)                                     |
| Patient activation <sup>b</sup><br>Mean (SD) | 106 | 3.39(0.64)        | 67 | 3.28(0.83)   | -0.007 (-0.21 to 0.19)                                   |
| Patient activation <sup>c</sup><br>Mean (SD) | 106 | 3.18(0.74)        | 67 | 3.18 (0.78)  | -0.10(-0.32 to 0.11)                                     |
| Confidence<br>Mean (SD)                      | 95  | 1.44(0.70)        | 65 | 1.37(0.55)   | 0.08 (-0.12 to 0.27)                                     |
| Safety<br>Mean (SD)                          | 85  | 1.48(0.80)        | 62 | 1.34(0.57)   | 0.12(-0.10 to 0.34)                                      |
| Satisfaction<br>Mean (SD)                    | 85  | 1.61(0.73)        | 63 | 1.63(0.63)   | -0.02 (-0.23 to 0.18)                                    |

<sup>a</sup> The estimated intention-to-treat differences and 95% CIs were obtained after multiple linear regression adjusted for baseline measure

<sup>b</sup> I am confident that I can tell when I need to get outpatient care

<sup>c</sup> I am confident I can figure out solutions when new situations or problems arise with my health condition

SD: Standard deviation; CI: Confidence interval; ITT: Intention-to-treat; WHO-5: WHO-5 Well-being Index; GSE: General Self-efficacy Scale; HLQ: Health Literacy Questionnaire

## Additional file 3

### Analyses stratified on health literacy 'Social support for health' (HLQ4)

#### HLQ 4 HIGH (HLQ 4 scale measured at baseline $\geq 3.4$ )

Health care utilization during an 18-month follow-up period among outpatients with epilepsy

| Primary outcomes                     | Open access (ITT)<br>N = 183 | Control<br>N = 136 | ITT<br>Mean difference<br>(95%CI) |
|--------------------------------------|------------------------------|--------------------|-----------------------------------|
| Outpatient visits <sup>a</sup>       |                              |                    |                                   |
| Mean (SD)                            | 0.43 (0.91)                  | 0.40 (0.93)        | 0.03 (−0.16 to 0.23)              |
| Median (Range)                       | 0 (0–6)                      | 0 (0–6)            |                                   |
| Telephone consultations <sup>a</sup> |                              |                    |                                   |
| Mean (SD)                            | 1.04 (1.78)                  | 1.31 (2.18)        | −0.27 (−0.72 to 0.19)             |
| Median (Range)                       | 0 (0–10)                     | 1 (0–12)           |                                   |
| Hospitalizations <sup>a</sup>        |                              |                    |                                   |
| Mean (SD)                            | 0.03 (0.21)                  | 0.05 (0.49)        | −0.02 (−0.07 to 0.03)             |
| Median (Range)                       | 0 (0–2)                      | 0 (0–2)            |                                   |
| Emergency room visits <sup>b</sup>   |                              |                    |                                   |
| Mean (SD)                            | 0.05 (0.24)                  | 0.15 (0.45)        | −0.11 (−0.19 to −0.02)            |
| Median (Range)                       | 0 (0–2)                      | 0 (0–3)            |                                   |

<sup>a</sup> at the Department of Neurology, Aarhus University Hospital, <sup>b</sup> at Aarhus University Hospital

SD: Standard deviation; CI: Confidence interval; ITT: Intention-to-treat

The estimated IIT mean differences and 95% CIs were obtained after simple linear regression by using the bootstrap method with 1000 replications.

#### HLQ 4 LOW (HLQ 4 scale measured at baseline $< 3.4$ )

Health care utilization during an 18-month follow-up period among outpatients with epilepsy

| Primary outcomes                     | Open access (ITT)<br>N = 175 | Control<br>N = 113 | ITT<br>Mean difference<br>(95%CI) |
|--------------------------------------|------------------------------|--------------------|-----------------------------------|
| Outpatient visits <sup>a</sup>       |                              |                    |                                   |
| Mean (SD)                            | 0.45 (0.96)                  | 0.42 (0.75)        | 0.03 (−0.17 to 0.23)              |
| Median (Range)                       | 0 (0–7)                      | 0 (0–3)            |                                   |
| Telephone consultations <sup>a</sup> |                              |                    |                                   |
| Mean (SD)                            | 0.92 (1.92)                  | 1.32 (2.76)        | −0.40 (−0.98 to 0.18)             |
| Median (Range)                       | 0 (0–12)                     | 1 (0–22)           |                                   |
| Hospitalizations <sup>a</sup>        |                              |                    |                                   |
| Mean (SD)                            | 0.06 (0.34)                  | 0.12 (0.67)        | −0.06 (−0.19 to 0.07)             |
| Median (Range)                       | 0 (0–3)                      | 0 (0–5)            |                                   |
| Emergency room visits <sup>b</sup>   |                              |                    |                                   |
| Mean (SD)                            | 0.10 (0.48)                  | 0.22 (0.94)        | −0.12 (−0.31 to 0.06)             |
| Median (Range)                       | 0 (0–4)                      | 0 (0–7)            |                                   |

<sup>a</sup> at the Department of Neurology, Aarhus University Hospital, <sup>b</sup> at Aarhus University Hospital

SD: Standard deviation; CI: Confidence interval; ITT: Intention-to-treat

The estimated IIT mean differences and 95% CIs were obtained after simple linear regression by using the bootstrap method with 1000 replications.

## Additional file 3

### Analyses stratified on health literacy 'Social support for health" (HLQ4)

#### HLQ 4 HIGH (HLQ 4 scale measured at baseline $\geq 3.4$ )

Patient-reported outcomes measured 18 months after randomization among outpatients with epilepsy

| Secondary outcomes                           | N   | Open access (ITT) | N  | Control      | ITT: Difference <sup>a</sup> at 18-mo. follow-up (95%CI) |
|----------------------------------------------|-----|-------------------|----|--------------|----------------------------------------------------------|
| Well-being (WHO-5)<br>Mean (SD)              | 115 | 70.64(17.39)      | 89 | 69.29(18.01) | -3.68 (-7.39 to 0.03)                                    |
| Self-efficacy (GSE)<br>Mean (SD)             | 112 | 31.01(5.72)       | 90 | 30.96(5.42)  | -0.03 (-1.32 to 1.26)                                    |
| General health<br>Mean (SD)                  | 115 | 2.42(0.87)        | 92 | 2.41(0.71)   | 0.06 (-0.12 to 0.25)                                     |
| No. of seizure last year<br>Mean (SD)        | 98  | 2.19(11.36)       | 78 | 2.69(9.84)   | -0.34 (-3.60 to 2.92)                                    |
| Treatment side effects<br>Mean (SD)          | 115 | 1.46(0.72)        | 92 | 1.52(0.84)   | -0.05(-0.23 to 0.13)                                     |
| Patient activation <sup>b</sup><br>Mean (SD) | 113 | 3.54(0.64)        | 90 | 3.46(0.75)   | 0.06 (-0.12 to 0.23)                                     |
| Patient activation <sup>c</sup><br>Mean (SD) | 113 | 3.33(0.70)        | 90 | 3.21(0.79)   | -0.003(-0.20 to 0.19)                                    |
| Confidence<br>Mean (SD)                      | 104 | 1.31(0.58)        | 86 | 1.29(0.51)   | -0.03(-0.17 to 0.11)                                     |
| Safety<br>Mean (SD)                          | 98  | 1.34(0.67)        | 82 | 1.30(0.51)   | 0.02(-0.16 to 0.19)                                      |
| Satisfaction<br>Mean (SD)                    | 98  | 1.51(0.63)        | 81 | 1.56(0.63)   | -0.03 (-0.21 to 0.15)                                    |

<sup>a</sup> The estimated intention-to-treat differences and 95% CIs were obtained after multiple linear regression adjusted for baseline measure

<sup>b</sup> I am confident that I can tell when I need to get outpatient care

<sup>c</sup> I am confident I can figure out solutions when new situations or problems arise with my health condition

SD: Standard deviation; CI: Confidence interval; ITT: Intention-to-treat; WHO-5: WHO-5 Well-being Index; GSE: General Self-efficacy Scale; HLQ: Health Literacy Questionnaire



## Additional file 3

### Analyses stratified on health literacy 'Social support for health" (HLQ4)

#### HLQ 4 LOW (HLQ 4 scale measured at baseline < 3.4)

Patient-reported outcomes measured 18 months after randomization among outpatients with epilepsy

| Secondary outcomes                           | N  | Open access (ITT) | N  | Control      | ITT: Difference <sup>a</sup> at 18-mo. follow-up (95%CI) |
|----------------------------------------------|----|-------------------|----|--------------|----------------------------------------------------------|
| Well-being (WHO-5)<br>Mean (SD)              | 93 | 63.31(20.62)      | 61 | 64.98(20.63) | -2.73 (-8.08 to 2.62)                                    |
| Self-efficacy (GSE)<br>Mean (SD)             | 93 | 28.32(5.04)       | 59 | 27.76(6.60)  | -0.26 (-1.83 to 1.31)                                    |
| General health<br>Mean (SD)                  | 96 | 2.85(0.93)        | 61 | 2.87(0.92)   | 0.03 (-0.20 to 0.26)                                     |
| No. of seizure last year<br>Mean (SD)        | 81 | 2.60(11.99)       | 47 | 3.83(10.58)  | -2.04 (-5.43 to 1.35)                                    |
| Treatment side effects<br>Mean (SD)          | 91 | 1.60(0.80)        | 61 | 1.61(0.78)   | -0.02(-0.25 to 0.21)                                     |
| Patient activation <sup>b</sup><br>Mean (SD) | 93 | 3.28(0.61)        | 58 | 3.17(0.78)   | 0.06 (-0.16 to 0.29)                                     |
| Patient activation <sup>c</sup><br>Mean (SD) | 94 | 3.11(0.71)        | 58 | 3.00 (0.68)  | 0.03(-0.20 to 0.26)                                      |
| Confidence<br>Mean (SD)                      | 85 | 1.51(0.72)        | 57 | 1.39(0.56)   | 0.10(-0.11 to 0.32)                                      |
| Safety<br>Mean (SD)                          | 73 | 1.49(0.71)        | 56 | 1.43(0.63)   | 0.01(-0.22 to 0.25)                                      |
| Satisfaction<br>Mean (SD)                    | 77 | 1.75(0.71)        | 53 | 1.68(0.51)   | 0.05 (-0.17 to 0.28)                                     |

<sup>a</sup> The estimated intention-to-treat differences and 95% CIs were obtained after multiple linear regression adjusted for baseline measure

<sup>b</sup> I am confident that I can tell when I need to get outpatient care

<sup>c</sup> I am confident I can figure out solutions when new situations or problems arise with my health condition

SD: Standard deviation; CI: Confidence interval; ITT: Intention-to-treat; WHO-5: WHO-5 Well-being Index; GSE: General Self-efficacy Scale; HLQ: Health Literacy Questionnaire

## Additional file 3

### Sensitivity analyses of WHO-5 Well-being Index

Sensitivity analyses were performed to establish the impact of missing self-reported data in WHO-5 Well-Being Index. The response rate of the follow-up questionnaire was approximately 60%.

Mean and standard deviation (SD) of the WHO-5 Well-being Index measured at baseline and at follow-up (18 months after randomization):

|                       | <b>Intervention arm<br/>(open access telePRO)<br/><i>N</i> = 346</b> | <b>Control arm<br/>(standard telePRO)<br/><i>N</i> = 247</b> |
|-----------------------|----------------------------------------------------------------------|--------------------------------------------------------------|
| Baseline WHO-5        |                                                                      |                                                              |
| Mean (SD)             | 68.9 (18.9)                                                          | 68.0 (19.4)                                                  |
| Missing, <i>n</i> (%) | 10 (3)                                                               | 3 (1)                                                        |
| Follow-up WHO-5       |                                                                      |                                                              |
| Mean (SD)             | 67.0 (19.45)                                                         | 69.3 (18.01)                                                 |
| Missing, <i>n</i> (%) | 144 (42)                                                             | 97 (39)                                                      |

If the WHO-5 score was missing at follow-up, the score was imputed by using the WHO-5 score from the baseline questionnaire. Four scenarios regarding the imputed follow-up values were considered:

#### Analysis 1

Intervention arm: Baseline WHO reduced with 5 points

Control arm: WHO-5 baseline unchanged

#### Analysis 2

Intervention arm: WHO-5 baseline unchanged

Control arm: Baseline WHO reduced with 5 points

#### Analysis 3

Intervention arm: Baseline WHO increased with 5 points

Control arm: WHO-5 baseline unchanged

#### Analysis 4

Intervention arm: WHO-5 baseline unchanged

Control arm: Baseline WHO increased with 5 points

Then, between-arm differences in the WHO-5 score at follow-up were analyzed by multiple linear regression adjusted for the baseline WHO-5 value. Patients who died or emigrated (*N* = 7) or had missing WHO-5 scores at both baseline and follow-up (*N*=3) were not included in the analyses.

| <b>WHO-5 Well-being</b> | <b>Intervention arm<br/><i>N</i> = 341</b> | <b>Control arm<br/><i>N</i> = 242</b> | <b>Difference at 18 mo. follow-up<br/>(95% Confidence interval)</b> |
|-------------------------|--------------------------------------------|---------------------------------------|---------------------------------------------------------------------|
| <b>Analysis 1</b>       |                                            |                                       |                                                                     |
| WHO-5 mean (SD)         | 64.4 (19.5)                                | 67.7 (18.6)                           | -4.02 (-5.94 to -2.10)                                              |
| <b>Analysis 2</b>       |                                            |                                       |                                                                     |
| WHO-5 mean (SD)         | 66.5 (19.3)                                | 65.8 (19.0)                           | 0.11 (-1.84 to 2.07)                                                |
| <b>Analysis 3</b>       |                                            |                                       |                                                                     |
| WHO-5 mean (SD)         | 68.5 (19.3)                                | 67.7 (18.6)                           | 0.18 (-1.81 to 2.17)                                                |
| <b>Analysis 4</b>       |                                            |                                       |                                                                     |
| WHO-5 mean (SD)         | 66.5 (19.3)                                | 69.7 (18.5)                           | -3.83 (-5.78 to -1.88)                                              |

## **Additional file 3**

### **The randomization computer code**

The randomization was programmed in the computer language PHP:

```
$fraction= round(mt_rand() / mt_getrandmax(),4); //generates random decimal fraction between  
0.000 and 1.000
```

```
IF($fraction>0.45)
```

```
$allocation='OpenAccess';
```

```
ELSE
```

```
$allocation='Normal';
```
